# Supplementary material for: Heme is responsible for enhanced singlet oxygen deactivation in cytochrome c
Source: Royal Society of Chemistry journal article supplement (doi:10.1039/d1cp01517f), 2021-01-01
Supplement: d1cp01517f1.pdf [file d1cp01517f1.pdf]

## Supporting information

to

### Heme is responsible for enhanced singlet oxygen deactivation in cytochrome *c*

Andrej Hovan, Martin Berta, Dagmar Sedláková,  
Pavol Miskovsky, Gregor Bánó and Erik Sedlák

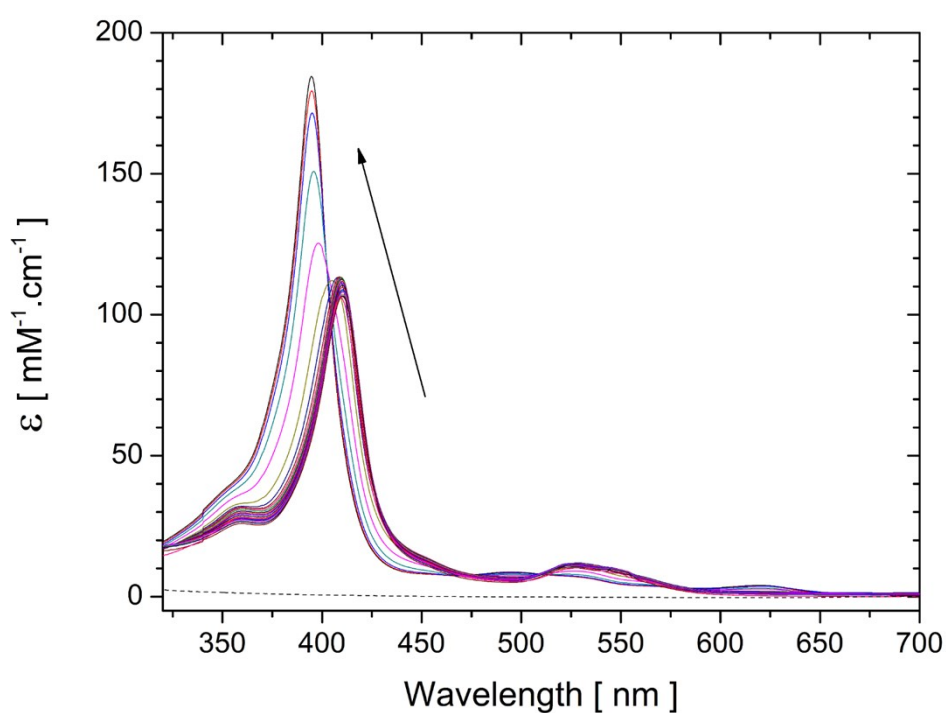

**Figure S1.** The pH dependence of the absorbance spectrum of cyt *c* (thin lines), from pH 7.4 to pH  $\sim$ 1.8. The arrow indicates changes in the absorbance spectrum of cyt *c* with pH decrease. The spectrum of apocyt *c* at pH 7.4 is shown by dashed line. The spectrum of apocyt *c* at pH 2.0 is identical with the one at pH 7.4 (data not shown).

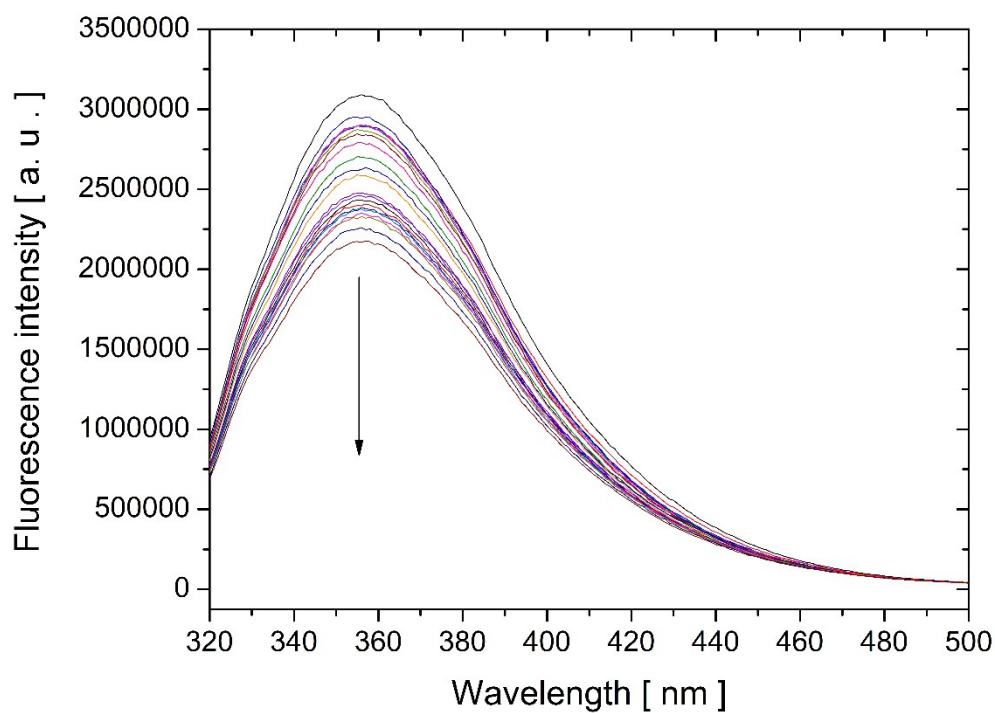

**Figure S2.** The pH dependence of the apocyt *c* fluorescence spectrum (thin lines), from pH 7.4 to pH ~1.8. The arrow indicates changes in the fluorescence spectrum of apocyt *c* with pH decrease.

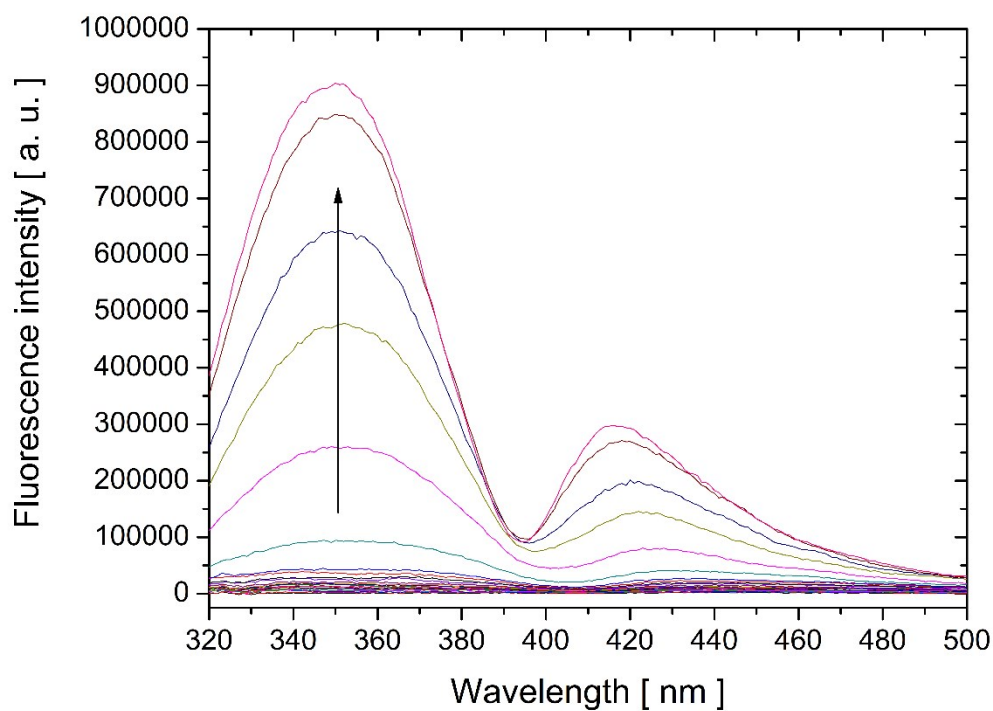

**Figure S3.** The pH dependence of the cyt *c* fluorescence spectrum (thin lines), from pH 7.4 to pH ~1.8. The arrow indicates changes in the fluorescence spectrum of cyt *c* with pH decrease.

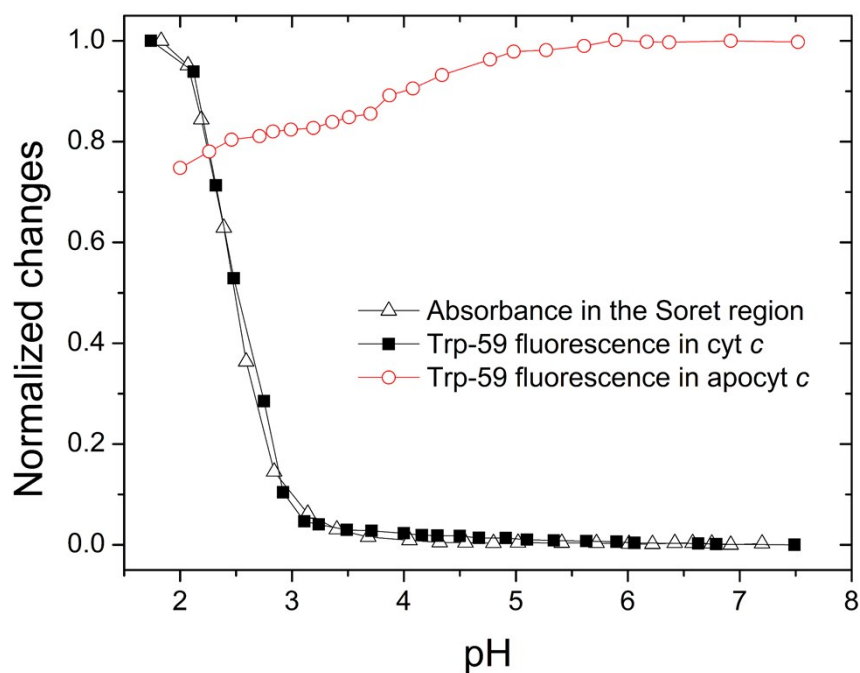

**Figure S4.** Absorbance in the Soret region ( $\Delta$ ) and tryptophan fluorescence of cyt *c* at 350 nm ( $\blacksquare$ ) and apocyt *c* at 355 nm ( $\circ$ ). The data of absorbance and fluorescence changes of cyt *c* were normalized on difference between signals at pH~2 and at pH 7.4. The data of fluorescence of apocyt *c* were normalized on the maximal value.

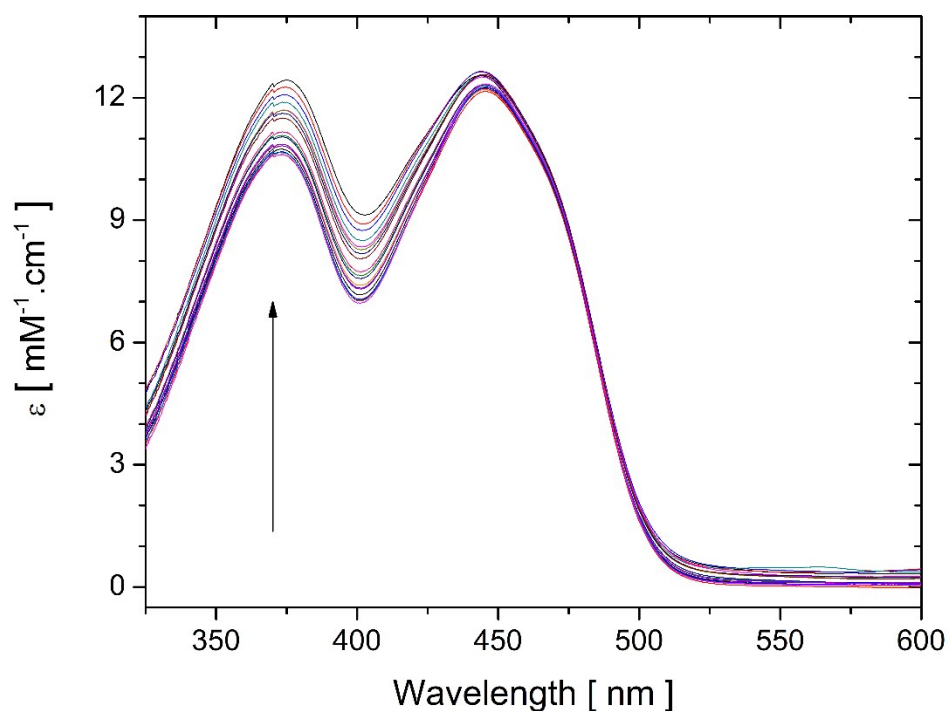

**Figure S5.** The pH dependence of the absorbance spectrum of FMN, from pH 7.4 to pH ~1.8. The arrow indicates changes in the absorbance spectrum of FMN with pH decrease.

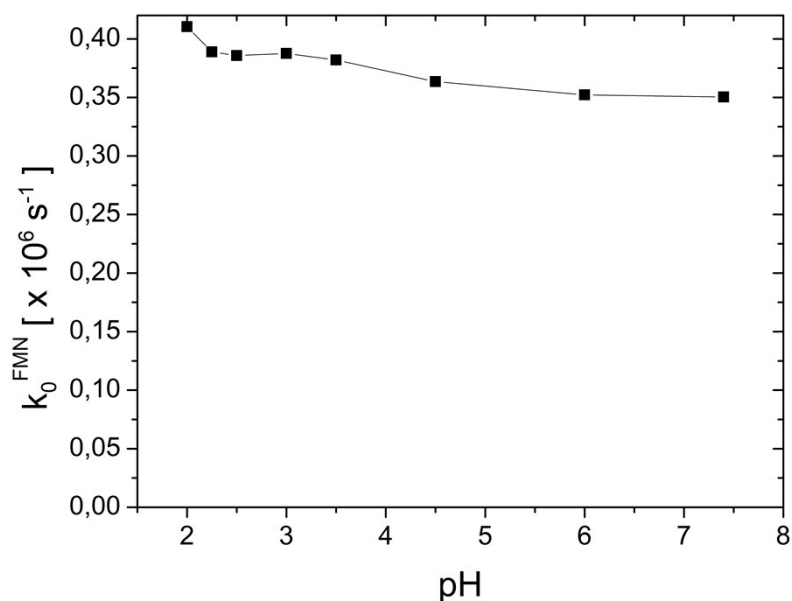

**Figure S6.** The pH dependence of the first order rate constants for FMN triplet state quenching in the pure solvent. The typical error of the presented points is around  $0.003 \times 10^6 s^{-1}$ .

**Table S1.** Lifetimes of FMN triplet state ( $\tau_T$ ) and singlet oxygen ( $\tau_\Delta$ ) obtained in the presence of 100 mM *cyt c* and *apocyt c* and in the absence of proteins at pH 7.4 and pH 2. The lifetime values were evaluated from the transient absorption and the singlet oxygen phosphorescence experiments.

|                          | pH 7.4             |                                |                                | pH 2               |                                |                                |
|--------------------------|--------------------|--------------------------------|--------------------------------|--------------------|--------------------------------|--------------------------------|
|                          | no protei<br>n     | 100<br>$\mu$ M<br><i>cyt c</i> | 100 $\mu$ M<br><i>apocyt c</i> | no protei<br>n     | 100<br>$\mu$ M<br><i>cyt c</i> | 100 $\mu$ M<br><i>apocyt c</i> |
| $\tau_T$ ( $\mu$ s)      | 2.88<br>$\pm 0.01$ | 2.33<br>$\pm 0.01$             | 1.31<br>$\pm 0.01$             | 2.55<br>$\pm 0.01$ | 1.39<br>$\pm 0.01$             | 1.39<br>$\pm 0.01$             |
| $\tau_\Delta$ ( $\mu$ s) | 3.49<br>$\pm 0.03$ | 3.24<br>$\pm 0.03$             | 3.36<br>$\pm 0.03$             | 3.43<br>$\pm 0.03$ | 1.61<br>$\pm 0.03$             | 3.32<br>$\pm 0.03$             |
